# Supplementary material
Source: PubMed Central journal article supplement (PMC6560340)
Supplement: ba032094-suppl1.pdf [file ba032094-suppl1.pdf]

## APPENDIX I

### Intravenous Methotrexate Dose Modifications for Toxicity

#### Absolute neutrophil count (ANC) < 1,000/ $\mu$ L and/or platelet count < 100,000/ $\mu$ L

Methotrexate should be omitted for ANC less than 1,000/ $\mu$ L and/or platelet count less than 100,000/ $\mu$ L. Once ANC recovers to equal or above 1,000/ $\mu$ L, and platelet count equal to or above 100,000/ $\mu$ L, methotrexate should be administered on first due date following held dose; dosage should be 20% less than last administered dose. If the latter dose is tolerated, escalation should continue by 50 mg/m<sup>2</sup> increments.

#### Liver Dysfunction

Withhold dose if direct (conjugated) bilirubin is > 1 mg/dL and/or AST/ALT is > 1,000 U/L and/or PT/INR is prolonged (unrelated to Vitamin K deficiency) on two determinations at least one week apart. Exclude viral hepatitis. Restart at full dose when AST/ALT is < 400 U/L and direct (conjugated) bilirubin is < 1 mg/dL and PT/INR is normal.

#### Mucositis

For Grade 2 (CTCAE vs 2) stomatitis of > 3 days duration: decrease dose by 20%. For Grade 3-4 stomatitis, withhold intravenous methotrexate until resolved; resume at 50% dose and subsequently escalate to 75% to 100% dose at 10-day intervals if Grade 3-4 toxicity does not recur. Consider culturing lesions for herpes simplex if mucositis persists or recurs.

#### Kidney Dysfunction Grades 2-4 (CTCAE vs 2)

Omit IV MTX until Grade 0 toxicity (resolved). Resume at 100% dose

**CCG-1991 Participating Institution**

Princess Margaret Hospital for Children  
Children's Healthcare of Atlanta - Egleston  
Primary Children's Hospital  
University of Wisconsin Hospital and Clinics  
Nationwide Children's Hospital  
Connecticut Children's Medical Center  
Children's Hospitals and Clinics of Minnesota - Minneapolis  
Children's Hospital of The King's Daughters  
Valley Children's Hospital  
New York Medical College  
Methodist Children's Hospital of South Texas  
Seattle Children's Hospital  
Norton Children's Hospital  
Children's Hospital of Philadelphia  
Children's Hospital and Clinic-Saint Paul  
Miller Children's and Women's Hospital Long Beach  
Presbyterian - Saint Lukes Medical Center - Health One  
Children's Hospital of Orange County  
Children's Hospital of Los Angeles  
Saint Joseph's Regional Medical Center  
Children's Specialty Center of Nevada II  
Kaiser Permanente-Oakland  
Mary Bridge Children's Hospital and Health Center  
Phoenix Children's Hospital  
Allan Blair Cancer Centre  
Beaumont Children's Hospital-Royal Oak  
Columbia University/Herbert Irving Cancer Center  
Covenant Children's Hospital

Michigan State University Clinical Center  
Cincinnati Children's Hospital Medical Center  
Alfred I duPont Hospital for Children  
Children's National Medical Center  
North Shore University Hospital  
Riley Hospital for Children  
Dayton Children's Hospital  
Montefiore Medical Center - Moses Campus  
University of Iowa/Holden Comprehensive Cancer Center  
Saint Vincent Hospital Cancer Center Green Bay  
Group Health Cooperative of Puget Sound Oncology Consortium  
UCSF Medical Center-Mission Bay  
Dell Children's Medical Center of Central Texas  
Kaiser Permanente Downey Medical Center  
Advocate Children's Hospital-Park Ridge  
C S Mott Children's Hospital  
Loma Linda University Medical Center  
University of Kentucky/Markey Cancer Center  
Loyola University Medical Center  
Vanderbilt University/Ingram Cancer Center  
CancerCare Manitoba  
Albany Medical Center  
Children's Mercy Hospitals and Clinics  
Sanford Broadway Medical Center  
IWK Health Centre  
British Columbia Children's Hospital  
Rainbow Babies and Childrens Hospital  
Henry Ford Hospital  
Children's Hospital Colorado

Helen DeVos Children's Hospital at Spectrum Health  
Blank Children's Hospital  
Newark Beth Israel Medical Center  
Baystate Medical Center  
Morristown Medical Center  
Bronson Methodist Hospital  
Deaconess Medical Center  
University of Illinois - Rockford  
University of Minnesota/Masonic Cancer Center  
Marshfield Clinic  
Brooklyn Hospital Center  
The Steven and Alexandra Cohen Children's Medical Center of New York  
Texas Tech University Health Sciences Center-Amarillo  
Maimonides Medical Center  
Penn State Children's Hospital  
Saint Luke's Mountain States Tumor Institute  
Geisinger Medical Center  
Laura and Isaac Perlmutter Cancer Center at NYU Langone  
Janeway Child Health Centre  
Children's Hospital of Pittsburgh of UPMC  
Children's Hospital and Medical Center of Omaha  
Mattel Children's Hospital UCLA  
University of Nebraska Medical Center  
Palmetto Health Richland  
Children's Hospital and Research Center at Oakland  
Southern Illinois University School of Medicine  
Medical Center of Central Georgia  
Memorial Health University Medical Center  
Children's Hospital Medical Center of Akron

Bellin Memorial Hospital  
Saint Barnabas Medical Center  
Santa Barbara Cottage Hospital  
Sinai Hospital of Baltimore  
Augusta University Medical Center  
Memorial Sloan Kettering Cancer Center  
East Tennessee Children's Hospital  
UNC Lineberger Comprehensive Cancer Center  
Cedars-Sinai Medical Center  
Cleveland Clinic Foundation  
Children's Hospital  
University of Chicago Comprehensive Cancer Center  
NYU Winthrop Hospital  
Mercy Children's Hospital  
Brookdale Hospital Medical Center  
Weill Medical College of Cornell University  
M D Anderson Cancer Center  
Mayo Clinic  
University of Illinois  
Saskatoon Cancer Centre  
Tod Children's Hospital - Forum Health  
Saint Vincent Hospital and Health Care Center  
The Toledo Hospital/Toledo Children's Hospital  
Starship Children's Hospital  
Gundersen Lutheran Health System/CCOP  
City of Hope Comprehensive Cancer Center  
MedStar Georgetown University Hospital  
Sanford USD Medical Center - Sioux Falls  
Oregon Health and Science University

Saint Peter's University Hospital

Dakota Midwest Cancer Institute

Mount Sinai Hospital

Providence Sacred Heart Medical Center and Children's Hospital

UC Irvine Medical Center/Chao Family Comprehensive Cancer Center

Royal Children's Hospital

State University of New York Downstate Medical Center

T C Thompson Children's Hospital

Cabell Huntington Hospital
